# Supplementary material for: Microbiota changes with fermented kimchi contributed to either the amelioration or rejuvenation of Helicobacter pylori-associated chronic atrophic gastritis
Source: PubMed Central journal article supplement — J Clin Biochem Nutr. 2021 Apr 10;69(1):98–110. doi: 10.3164/jcbn.20-123 (PMC8325762; doi:10.3164/jcbn.20-123), 2021-04-10
Supplement: jcbn20-123sf01.pdf [file jcbn20-123sf01.pdf]

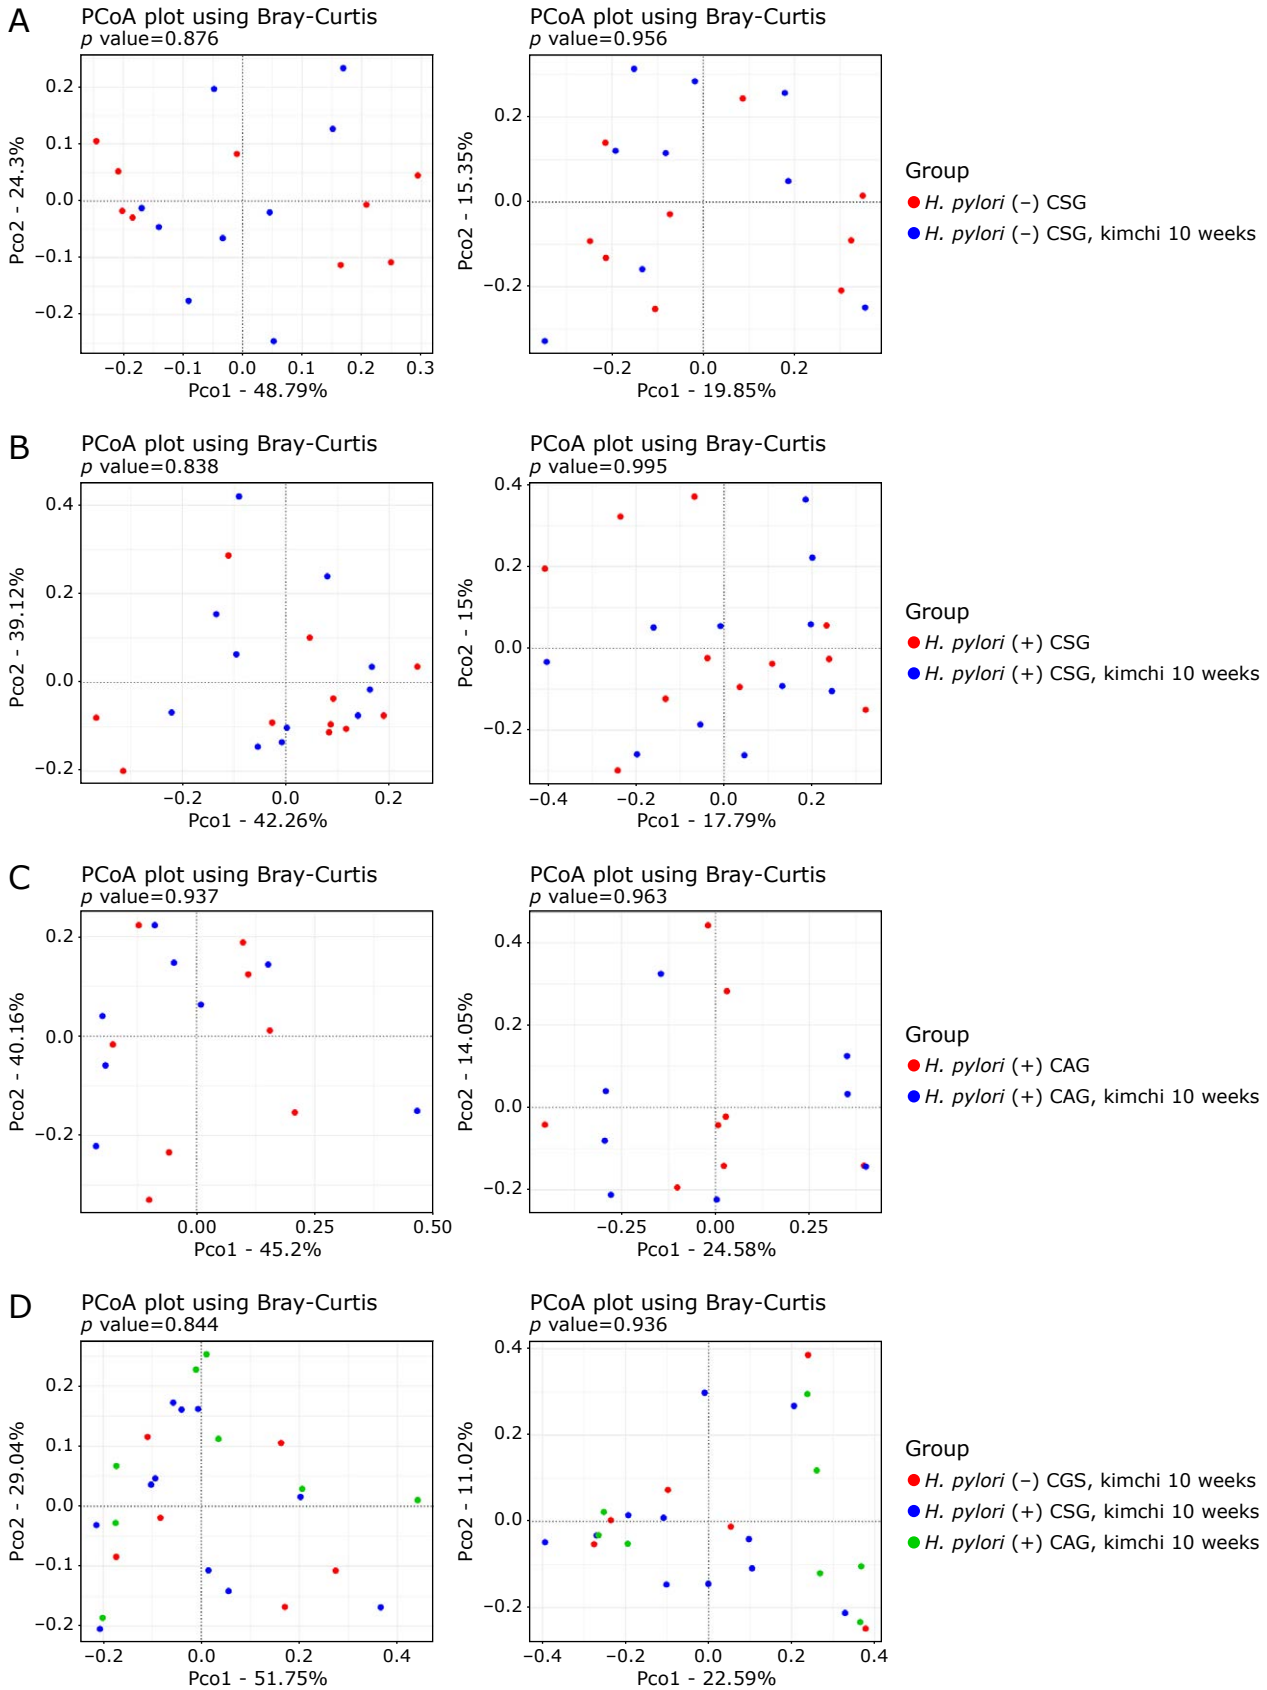

**Supplemental Fig. 1.** (A) PCoA between *H. pylori* (-) CSG and *H. pylori* (-) CSG after 10 weeks of fermented kimchi intake, before kimchi intake, left; phylum and right; genus level plot. (B) PCoA between *H. pylori* (+) CSG and *H. pylori* (+) CSG after 10 weeks of fermented kimchi intake, left; phylum and right; genus level plot. (C) PCoA between *H. pylori* (+) CAG and *H. pylori* (+) CAG after 10 weeks of fermented kimchi intake, left; phylum and right; genus level plot. (D) PCoA between *H. pylori* (-) CSG, *H. pylori* (+) CSG, and *H. pylori* (+) CAG after 10 weeks of fermented kimchi intake, left; phylum and right; genus level.
