# Supplementary material for: Microbiota changes with fermented kimchi contributed to either the amelioration or rejuvenation of Helicobacter pylori-associated chronic atrophic gastritis
Source: PubMed Central journal article supplement — J Clin Biochem Nutr. 2021 Apr 10;69(1):98–110. doi: 10.3164/jcbn.20-123 (PMC8325762; doi:10.3164/jcbn.20-123), 2021-04-10
Supplement: jcbn20-123sf02.pdf [file jcbn20-123sf02.pdf]

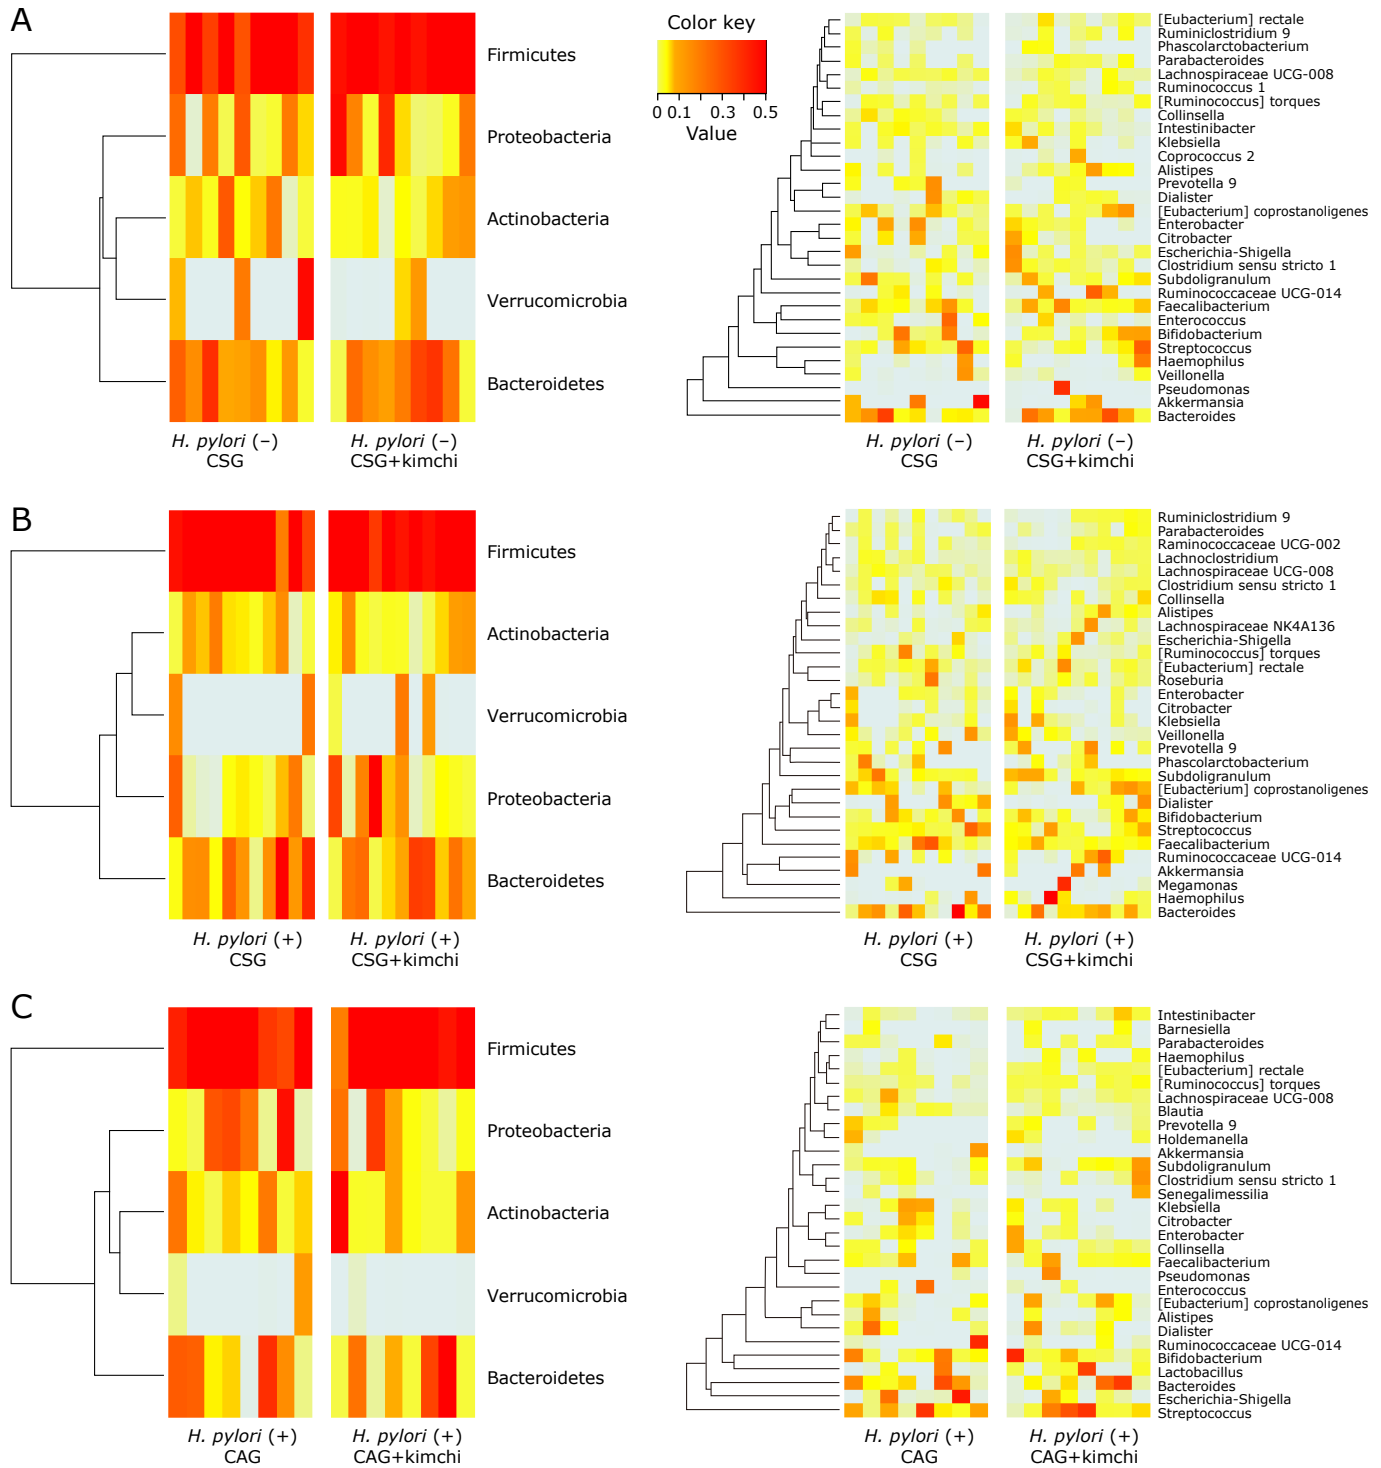

**Supplemental Fig. 2.** Heatmap (A) between *H. pylori* (-) CSG and *H. pylori* (-) CSG with 10 weeks of fermented kimchi intake, upper figure denoted phylum level and lower figure denoted genus level analysis, (B) between *H. pylori* (+) CSG and *H. pylori* (+) CSG with 10 weeks of fermented kimchi intake, upper figure denoted phylum level and lower figure denoted genus level analysis, (C) between *H. pylori* (+) CAG and *H. pylori* (+) CAG with 10 weeks of fermented kimchi intake, upper figure denoted phylum level and lower figure denoted genus level analysis.
