# Supplementary material for: Microbiota changes with fermented kimchi contributed to either the amelioration or rejuvenation of Helicobacter pylori-associated chronic atrophic gastritis
Source: PubMed Central journal article supplement — J Clin Biochem Nutr. 2021 Apr 10;69(1):98–110. doi: 10.3164/jcbn.20-123 (PMC8325762; doi:10.3164/jcbn.20-123), 2021-04-10
Supplement: jcbn20-123sf03.pdf [file jcbn20-123sf03.pdf]

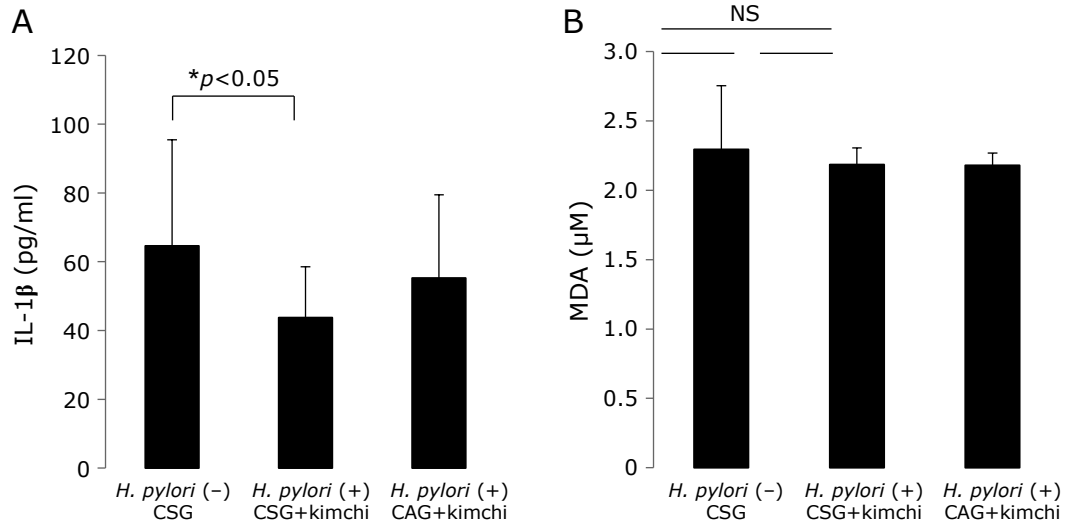

**C**

| Taxon                                | Successful eradication group (n=7) |       |       |       |        |                    | Not eradicated group (n=14) |       |       |       |        |                    |
|--------------------------------------|------------------------------------|-------|-------|-------|--------|--------------------|-----------------------------|-------|-------|-------|--------|--------------------|
|                                      | Pre                                |       | Post  |       | Δmean  | log2 (fold-change) | Pre                         |       | Post  |       | Δmean  | log2 (fold-change) |
|                                      | Mean                               | SD    | Mean  | SD    |        |                    | Mean                        | SD    | Mean  | SD    |        |                    |
| <i>Streptococcus</i>                 | 0.136                              | 0.147 | 0.086 | 0.133 | -0.049 | -0.653             | 0.032                       | 0.034 | 0.034 | 0.042 | 0.002  | 0.071              |
| <i>Faecalibacterium</i>              | 0.035                              | 0.078 | 0.030 | 0.020 | -0.006 | -0.254             | 0.077                       | 0.092 | 0.047 | 0.030 | -0.029 | -0.701             |
| <i>Lactobacillus</i>                 | 0.095                              | 0.169 | 0.050 | 0.130 | -0.045 | -0.936             | 0.002                       | 0.003 | 0.004 | 0.004 | 0.002  | 1.189              |
| <i>Akkermansia</i>                   | 0.070                              | 0.119 | 0.006 | 0.017 | -0.064 | -3.447             | 0.020                       | 0.059 | 0.002 | 0.005 | -0.018 | -3.246             |
| <i>Dialister</i>                     | 0.022                              | 0.036 | 0.055 | 0.070 | 0.033  | 1.314              | 0.048                       | 0.087 | 0.023 | 0.056 | -0.025 | -1.034             |
| <i>Subdoligranulum</i>               | 0.015                              | 0.026 | 0.040 | 0.041 | 0.024  | 1.389              | 0.049                       | 0.070 | 0.061 | 0.041 | 0.012  | 0.312              |
| <i>Enterococcus</i>                  | 0.055                              | 0.099 | 0.010 | 0.026 | -0.045 | -2.411             | 0.004                       | 0.009 | 0.004 | 0.011 | 0.001  | 0.266              |
| <i>Phascolarctobacterium</i>         | 0.009                              | 0.021 | 0.002 | 0.004 | -0.007 | -2.303             | 0.034                       | 0.070 | 0.016 | 0.032 | -0.019 | -1.142             |
| <i>Ruminococcaceae UCG-014</i>       | 0.000                              | 0.000 | 0.037 | 0.077 | 0.037  | 13.080             | 0.032                       | 0.062 | 0.024 | 0.041 | -0.007 | -0.383             |
| <i>Prevotella 9</i>                  | 0.010                              | 0.013 | 0.021 | 0.043 | 0.011  | 1.053              | 0.020                       | 0.027 | 0.048 | 0.062 | 0.028  | 1.269              |
| <i>Roseburia</i>                     | 0.002                              | 0.002 | 0.009 | 0.012 | 0.007  | 2.338              | 0.027                       | 0.073 | 0.007 | 0.007 | -0.020 | -1.963             |
| <i>Collinsella</i>                   | 0.006                              | 0.008 | 0.016 | 0.027 | 0.010  | 1.477              | 0.023                       | 0.028 | 0.026 | 0.036 | 0.003  | 0.193              |
| <i>[Eubacterium] rectale group</i>   | 0.007                              | 0.012 | 0.007 | 0.005 | 0.000  | 0.029              | 0.017                       | 0.033 | 0.015 | 0.022 | -0.002 | -0.210             |
| <i>Veillonella</i>                   | 0.002                              | 0.003 | 0.006 | 0.008 | 0.004  | 1.564              | 0.020                       | 0.024 | 0.026 | 0.041 | 0.005  | 0.327              |
| <i>Clostridium sensu stricto1</i>    | 0.015                              | 0.030 | 0.007 | 0.007 | -0.008 | -1.144             | 0.006                       | 0.006 | 0.015 | 0.022 | 0.009  | 1.313              |
| <i>[Ruminococcus] torques group</i>  | 0.003                              | 0.003 | 0.009 | 0.010 | 0.006  | 1.433              | 0.013                       | 0.015 | 0.011 | 0.011 | -0.003 | -0.335             |
| <i>Ruminococcaceae UCG-002</i>       | 0.005                              | 0.008 | 0.004 | 0.006 | -0.001 | -0.333             | 0.011                       | 0.021 | 0.008 | 0.010 | -0.003 | -0.500             |
| <i>Blautia</i>                       | 0.010                              | 0.011 | 0.003 | 0.001 | -0.007 | -1.654             | 0.005                       | 0.003 | 0.004 | 0.004 | -0.001 | -0.219             |
| <i>Ruminococcaceae UCG-013</i>       | 0.010                              | 0.016 | 0.005 | 0.005 | -0.005 | -0.979             | 0.004                       | 0.004 | 0.012 | 0.011 | 0.008  | 1.646              |
| <i>Lachnospirillum</i>               | 0.004                              | 0.004 | 0.010 | 0.011 | 0.007  | 1.491              | 0.010                       | 0.013 | 0.012 | 0.008 | 0.002  | 0.232              |
| <i>Holdemanella</i>                  | 0.002                              | 0.004 | 0.000 | 0.000 | -0.001 | -3.309             | 0.012                       | 0.032 | 0.012 | 0.023 | 0.000  | 0.019              |
| <i>Intestinibacter</i>               | 0.009                              | 0.013 | 0.017 | 0.024 | 0.008  | 0.899              | 0.004                       | 0.004 | 0.018 | 0.029 | 0.014  | 2.292              |
| <i>Prevotella 7</i>                  | 0.011                              | 0.029 | 0.000 | 0.000 | -0.011 | -8.863             | 0.001                       | 0.002 | 0.002 | 0.007 | 0.002  | 2.018              |
| <i>Megasphaera</i>                   | 0.000                              | 0.000 | 0.000 | 0.000 | 0.000  | 1.452              | 0.011                       | 0.031 | 0.001 | 0.002 | -0.010 | -4.391             |
| <i>Weissella</i>                     | 0.008                              | 0.017 | 0.001 | 0.000 | -0.008 | -4.025             | 0.002                       | 0.004 | 0.001 | 0.001 | -0.001 | -1.033             |
| <i>Lachnospiraceae NK4A136 group</i> | 0.007                              | 0.011 | 0.009 | 0.012 | 0.002  | 0.408              | 0.003                       | 0.003 | 0.022 | 0.050 | 0.020  | 3.141              |
| <i>Eggerthella</i>                   | 0.007                              | 0.014 | 0.011 | 0.023 | 0.005  | 0.760              | 0.001                       | 0.002 | 0.001 | 0.001 | 0.000  | -0.357             |
| <i>Barnesiella</i>                   | 0.000                              | 0.000 | 0.003 | 0.008 | 0.003  | 3.718              | 0.005                       | 0.016 | 0.011 | 0.021 | 0.006  | 1.013              |

Supplemental Fig. 3. Changes of (A) IL-1β and (B) MDA, all measured by ELISA.
